# Supplementary material for: Listeria cossartiae sp. nov., Listeria immobilis sp. nov., Listeria portnoyi sp. nov. and Listeria rustica sp. nov., isolated from agricultural water and natural environments
Source: PubMed Central journal article supplement (PMC8289207; doi:10.1099/ijsem.0.004795), 2021-05-17

**Table S1.** Geographic location, sequence quality, and NCBI accession data for the 27 novel *Listeria* species isolates

| Novel Species                                 | Isolate                  | Geographic Location |            |              | Sequence Quality Data |             |                |            |                  | NCBI Accession Numbers |                              |                       |
|-----------------------------------------------|--------------------------|---------------------|------------|--------------|-----------------------|-------------|----------------|------------|------------------|------------------------|------------------------------|-----------------------|
|                                               |                          | State               | Latitude   | Longitude    | Total Length (Mb)     | G+C content | No. of Contigs | N50 length | Average Coverage | SRA*                   | Genome Assembly <sup>†</sup> | 16S rRNA <sup>#</sup> |
| <i>L. cossartiae</i> subsp. <i>cayugensis</i> | FSL L7-0123              | NC                  | 35.9370325 | -79.0672078  | 2.83                  | 38.56       | 9              | 523254     | 170              | SRR11343877            | JAARZC000000000              |                       |
| <i>L. cossartiae</i> subsp. <i>cayugensis</i> | FSL L7-0993 <sup>T</sup> | GA                  | 34.657462  | -84.106025   | 2.82                  | 38.61       | 29             | 335203     | 96               | SRR11343939            | JAASUV000000000              | MT117897              |
| <i>L. cossartiae</i> subsp. <i>cossartiae</i> | FSL L7-0229              | AL                  | 33.3367219 | -86.7407791  | 2.82                  | 38.67       | 13             | 523834     | 135              | SRR11344217            | JAARYM000000000              |                       |
| <i>L. cossartiae</i> subsp. <i>cossartiae</i> | FSL L7-0233              | AL                  | 33.3367219 | -86.7407791  | 2.87                  | 38.63       | 11             | 1439256    | 176              | SRR11344213            | JAARYJ000000000              |                       |
| <i>L. cossartiae</i> subsp. <i>cossartiae</i> | FSL L7-0253              | AL                  | 33.3435544 | -86.7345114  | 2.80                  | 38.75       | 12             | 522584     | 148              | SRR11344210            | JAARYG000000000              |                       |
| <i>L. cossartiae</i> subsp. <i>cossartiae</i> | FSL L7-0478              | AL                  | 33.4517    | -85.85       | 2.75                  | 38.88       | 10             | 1409620    | 41               | SRR11344101            | JAASWP000000000              |                       |
| <i>L. cossartiae</i> subsp. <i>cossartiae</i> | FSL-L7-1425              | AL                  | 33.1864    | -86.1561     | 2.78                  | 38.8        | 14             | 495198     | 102              | SRR11343896            | JAASUM000000000              |                       |
| <i>L. cossartiae</i> subsp. <i>cossartiae</i> | FSL-L7-1426              | AL                  | 33.1864    | -86.1561     | 2.87                  | 38.64       | 30             | 494483     | 89               | SRR11343895            | JAASUL000000000              |                       |
| <i>L. cossartiae</i> subsp. <i>cossartiae</i> | FSL-L7-1434              | AL                  | 33.1909    | -86.1508     | 2.80                  | 38.8        | 15             | 505744     | 100              | SRR11343892            | JAASUK000000000              |                       |
| <i>L. cossartiae</i> subsp. <i>cossartiae</i> | FSL-L7-1435              | AL                  | 33.1909    | -86.1508     | 2.85                  | 38.68       | 126            | 337809     | 100              | SRR11343891            | JAASUJ000000000              |                       |
| <i>L. cossartiae</i> subsp. <i>cossartiae</i> | FSL-L7-1447 <sup>T</sup> | AL                  | 33.1962    | -86.1388     | 2.82                  | 38.73       | 16             | 1417199    | 86               | SRR11343890            | JAASUI000000000              | MT124497              |
| <i>L. farberi</i>                             | FSL-L7-0072              | TX                  | 29.55308   | -98.7545     | 2.95                  | 36.85       | 14             | 539249     | 343              | SRR11343947            | JAARZO000000000              |                       |
| <i>L. farberi</i>                             | FSL-L7-0083              | TX                  | 29.5391    | -98.75099    | 2.94                  | 36.91       | 15             | 1483358    | 242              | SRR11343913            | JAARZL000000000              |                       |
| <i>L. farberi</i>                             | FSL-L7-0091 <sup>T</sup> | TX                  | 31.03675   | -97.5287     | 3.02                  | 36.75       | 61             | 168881     | 95               | SRR11344176            | JAARZJ000000000              | MT117899              |
| <i>L. farberi</i>                             | FSL L7-1693              | FL                  | 29.8537    | -81.87718    | 2.86                  | 36.84       | 16             | 1512479    | 94               | SRR11344027            | JAARPJ000000000              |                       |
| <i>L. farberi</i>                             | FSL L7-1699              | FL                  | 29.84415   | -81.87673    | 2.99                  | 36.82       | 86             | 1162269    | 154              | SRR11344025            | JAARPH000000000              |                       |
| <i>L. immobilis</i>                           | FSL-L7-1485              | WY                  | 44.0632703 | -104.6894801 | 2.91                  | 35.94       | 60             | 155385     | 114              | SRR11343882            | JAASUF000000000              |                       |
| <i>L. immobilis</i>                           | FSL-L7-1509              | SD                  | 43.9100485 | -102.6949291 | 3.04                  | 35.94       | 62             | 183435     | 101              | SRR11343875            | JAASUD000000000              |                       |
| <i>L. immobilis</i>                           | FSL-L7-1510              | SD                  | 43.9100485 | -102.6949291 | 2.94                  | 35.93       | 46             | 214661     | 58               | SRR11343874            | JAASUC000000000              |                       |
| <i>L. immobilis</i>                           | FSL-L7-1515              | SD                  | 43.8953882 | -102.6854116 | 3.07                  | 35.94       | 52             | 177674     | 49               | SRR11344254            | JAASUB000000000              |                       |
| <i>L. immobilis</i>                           | FSL-L7-1517              | WY                  | 43.890325  | -107.6895718 | 2.98                  | 35.78       | 37             | 227776     | 49               | SRR11344253            | JAASUA000000000              |                       |
| <i>L. immobilis</i>                           | FSL-L7-1519 <sup>T</sup> | WY                  | 43.890325  | -107.6895718 | 3.07                  | 35.92       | 46             | 156931     | 47               | SRR11344252            | JAASTZ000000000              | MT117845              |
| <i>L. immobilis</i>                           | FSL-L7-1554              | MT                  | 46.0519691 | -105.5742674 | 2.92                  | 35.92       | 44             | 144674     | 39               | SRR11344243            | JAASTW000000000              |                       |
| <i>L. immobilis</i>                           | FSL-L7-1558              | MT                  | 46.0519691 | -105.5742674 | 2.94                  | 35.92       | 61             | 108742     | 33               | SRR11344242            | JAASTV000000000              |                       |
| <i>L. immobilis</i>                           | FSL-L7-1578              | SD                  | 44.7082988 | -103.7171173 | 3.02                  | 35.96       | 53             | 138184     | 46               | SRR11344237            | JAASTU000000000              |                       |
| <i>L. portnoyi</i>                            | FSL L7-1582 <sup>T</sup> | SD                  | 44.7082988 | -103.71712   | 3.16                  | 41.9        | 62             | 125185     | 55               | SRR11344233            | JAASTT000000000              | MT117898              |
| <i>L. rustica</i> <sup>§</sup>                | FSL W9-0585 <sup>T</sup> | NY                  | 42.422845  | -76.832515   | 3.49                  | 42.25       | 65             | 171825     | 123              | SRR11780234            | JABJVM000000000              | MT117896              |

\*The Sequence Read Archive (SRA) database

<sup>†</sup>The GenBank Genome database for the assembled draft genomes<sup>#</sup>The GenBank database for prokaryotic 16S rRNA. 16SrRNA sequences were extracted from the draft genomes of the type strains only<sup>§</sup>*L. rustica* is the only isolate obtained from agricultural water, all other isolates originated from soil

**Table S2.** Bacterial numbers of the novel *Listeria* spp. and two subspecies following the temperature growth experiments

| Novel Species                                 | Isolate                  | Log CFU/mL at each incubation time and temperature <sup>†</sup> |      |      |      |      |      |        |           |        |           |
|-----------------------------------------------|--------------------------|-----------------------------------------------------------------|------|------|------|------|------|--------|-----------|--------|-----------|
|                                               |                          | 4°C                                                             |      | 22°C |      | 30°C |      | 37°C   |           | 41°C   |           |
|                                               |                          | 10 d                                                            | 14 d | 24 h | 48 h | 24 h | 48 h | 24 h   | 48 h      | 24 h   | 48 h      |
| <i>L. cossartiae</i> subsp. <i>cossartiae</i> | FSL L7-1447 <sup>T</sup> | 1.44                                                            | 2.93 | 4.03 | 6.84 | 6.96 | 6.34 | 6.72   | 5.95      | 6.72   | 5.77      |
| <i>L. cossartiae</i> subsp. <i>cossartiae</i> | FSL L7-0253              | 1.68                                                            | 2.92 | 5.05 | 7.26 | 7.21 | 6.16 | 7.14   | 6.58      | 7.35   | 6.42      |
| <i>L. cossartiae</i> subsp. <i>cayugensis</i> | FSL L7-0993 <sup>T</sup> | 1.68                                                            | 3.21 | 5.17 | 7.58 | 7.58 | 6.52 | 7.01   | 6.67      | 7.15   | 6.35      |
| <i>L. farberii</i>                            | FSL L7-0091 <sup>T</sup> | 1.78                                                            | 2.93 | 4.60 | 6.78 | 6.72 | 6.60 | 6.77   | 6.16      | 6.74   | 5.82      |
| <i>L. immobilis</i>                           | FSL L7-1517              | 1.29                                                            | 1.85 | 4.86 | 7.31 | 7.33 | 7.05 | 7.17   | 6.56      | 5.49   | 6.70      |
| <i>L. immobilis</i>                           | FSL L7-1519 <sup>T</sup> | 1.31                                                            | 2.16 | 3.85 | 6.86 | 6.71 | 6.64 | 6.81   | 6.27      | 5.20   | 5.96      |
| <i>L. immobilis</i>                           | FSL L7-1554              | 1.35                                                            | 1.89 | 3.44 | 6.93 | 7.08 | 7.15 | 7.30   | 6.31      | 4.09   | 6.72      |
| <i>L. portnoyi</i>                            | FSL L7-1582 <sup>T</sup> | 3.5                                                             | 5.18 | 6.44 | 5.50 | 6.50 | 5.29 | -1.09* | No Growth | -0.78* | No Growth |
| <i>L. rustica</i>                             | FSL W9-0585 <sup>T</sup> | 3.11                                                            | 4.79 | 4.91 | 6.20 | 6.44 | 6.12 | 1.34   | 1.73      | -0.76* | No Growth |
| <i>L. monocytogenes</i>                       | 10403S <sup>‡</sup>      | 1.21                                                            | 2.54 | 4.81 | 7.61 | 7.54 | 6.74 | 7.34   | 6.62      | 7.34   | 6.44      |

<sup>†</sup>The average CFU/mL of two biological replicates from each time and temperature combination after accounting for the starting inoculum. Each biological replicate is the average of two technical replicates. All isolate-temperature combinations that yielded “No Growth” were verified with a third biological replicate.

\*Negative bacterial numbers reflect a reduction from the starting inoculum.

<sup>‡</sup>*L. monocytogenes* 10403S was used as a control sample.

**Table S3.** Biochemical results from API 50CH not reported in Table 3

|                                    | Novel Species        |     |     |                   |     |
|------------------------------------|----------------------|-----|-----|-------------------|-----|
|                                    | <i>sensu stricto</i> |     |     | <i>sensu lato</i> |     |
|                                    | Lcs                  | Lfr | Lim | Lpo               | Lru |
| Erythritol                         | -                    | -   | -   | -                 | -   |
| D-Arabinose                        | -                    | -   | -   | -                 | -   |
| L-Xylose                           | -                    | -   | -   | -                 | -   |
| D-Adonitol                         | -                    | -   | -   | -                 | -   |
| Methyl- $\alpha$ -D-Xylopyranoside | -                    | -   | -   | -                 | -   |
| D-Fructose                         | +                    | +   | +   | +                 | +   |
| D-Mannose                          | +                    | +   | +   | +                 | +   |
| Dulcitol                           | -                    | -   | -   | -                 | -   |
| D-Sorbitol                         | -                    | -   | -   | -                 | -   |
| N-Acetylglucosamine                | +                    | +   | +   | +                 | +   |
| Amygladin                          | +                    | +   | +   | +                 | +   |
| Arbutin                            | +                    | +   | +   | +                 | +   |
| Salicin                            | +                    | +   | +   | +                 | +   |
| D-Cellobiose                       | +                    | +   | +   | +                 | +   |
| D-Trehalose                        | V                    | -   | (+) | +                 | +   |
| D-Rafinose                         | -                    | -   | -   | -                 | -   |
| Amidon                             | -                    | -   | -   | -                 | -   |
| Glycogen                           | -                    | -   | -   | -                 | -   |
| Xylitol                            | +                    | +   | -   | -                 | -   |
| Gentiobiose                        | +                    | +   | +   | +                 | +   |
| D-Fucose                           | -                    | -   | -   | -                 | -   |
| L-Fucose                           | -                    | -   | -   | -                 | -   |
| L-Arabitol                         | -                    | -   | -   | -                 | -   |
| Potassium Gluconate                | -                    | -   | -   | -                 | -   |
| Potassium 2-Ketogluconate          | -                    | -   | -   | -                 | -   |
| Potassium 5-Ketogluconate          | -                    | -   | -   | -                 | -   |

+ positive; (+) weak positive; V variable between strains

**Table S4.** *Listeria* spp. flagellar motility genes from the cgMSLT1748 scheme from the Institut Pasteur open access BIGSDB-*Lm* platform

| <b>Locus</b> | <b>Full name/product</b>                      |
|--------------|-----------------------------------------------|
| Imo0676      | flagellar biosynthesis protein FliP           |
| Imo0677      | flagellar biosynthesis protein FliQ           |
| Imo0678      | flagellar biosynthesis protein FliR           |
| Imo0680      | flagellar biosynthesis protein FlhA           |
| Imo0681      | flagellar biosynthesis regulator FlhF         |
| Imo0682      | flagellar basal body rod protein FlgG         |
| Imo0685      | flagellar motor protein MotA                  |
| Imo0686      | flagellar motor rotation MotB                 |
| Imo0690      | flagellin                                     |
| Imo0693      | flagellar motor switch protein FliY           |
| Imo0696      | flagellar basal body rod modification protein |
| Imo0697      | flagellar hook protein FlgE                   |
| Imo0698      | flagellar motor switch protein                |
| Imo0699      | flagellar motor switch protein FliM           |
| Imo0700      | flagellar motor switch protein FliY           |
| Imo0705      | flagellar hook-associated protein FlgK        |
| Imo0706      | flagellar hook-associated protein FlgL        |
| Imo0707      | flagellar capping protein FliD                |
| Imo0708      | flagellar protein                             |
| Imo0710      | flagellar basal-body rod protein FlgB         |
| Imo0711      | flagellar basal body rod protein FlgC         |
| Imo0712      | flagellar hook-basal body protein FliE        |
| Imo0713      | flagellar MS-ring protein FliF                |
| Imo0714      | flagellar motor switch protein FliG           |
| Imo0715      | flagellar assembly protein H                  |
| Imo0716      | flagellum-specific ATP synthase               |

**Table S5.** Results from the novel species draft genome analyses for antibiotic resistance genes, prophages and plasmids

| Proposed Name                                 | Strain                   | AMR Genes <sup>†</sup> |            |                                    | Prophage*    |                      |                  | Plasmid <sup>‡</sup> |
|-----------------------------------------------|--------------------------|------------------------|------------|------------------------------------|--------------|----------------------|------------------|----------------------|
|                                               |                          | <i>FosX</i>            | <i>lin</i> | <i>Listeria monocytogenes mprF</i> | Intact (>90) | Questionable (70-90) | Incomplete (<70) |                      |
| <i>L. cossartiae</i> subsp. <i>cayugensis</i> | FSL L7-0123              | +                      | +          | +                                  | -            | -                    | 3                | 1                    |
| <i>L. cossartiae</i> subsp. <i>cayugensis</i> | FSL L7-0993 <sup>T</sup> | +                      | +          | +                                  | 1            | -                    | 1                | 1                    |
| <i>L. cossartiae</i> subsp. <i>cossartiae</i> | FSL L7-0229              | +                      | +          | -                                  | -            | 1                    | 1                | -                    |
| <i>L. cossartiae</i> subsp. <i>cossartiae</i> | FSL L7-0233              | +                      | +          | +                                  | -            | -                    | 2                | 1                    |
| <i>L. cossartiae</i> subsp. <i>cossartiae</i> | FSL L7-0253              | +                      | +          | -                                  | -            | -                    | 2                | 1                    |
| <i>L. cossartiae</i> subsp. <i>cossartiae</i> | FSL L7-0478              | +                      | +          | +                                  | -            | -                    | 1                | -                    |
| <i>L. cossartiae</i> subsp. <i>cossartiae</i> | FSL-L7-1425              | +                      | +          | +                                  | -            | -                    | 2                | -                    |
| <i>L. cossartiae</i> subsp. <i>cossartiae</i> | FSL-L7-1426              | +                      | +          | -                                  | -            | -                    | 1                | 2                    |
| <i>L. cossartiae</i> subsp. <i>cossartiae</i> | FSL-L7-1434              | +                      | -          | +                                  | -            | 1                    | 2                | -                    |
| <i>L. cossartiae</i> subsp. <i>cossartiae</i> | FSL-L7-1435              | +                      | +          | +                                  | -            | -                    | 2                | -                    |
| <i>L. cossartiae</i> subsp. <i>cossartiae</i> | FSL-L7-1447 <sup>T</sup> | +                      | +          | -                                  | -            | -                    | 2                | -                    |
| <i>L. farberi</i>                             | FSL-L7-0072              | +                      | -          | -                                  | 1            | -                    | 1                | 1                    |
| <i>L. farberi</i>                             | FSL-L7-0083              | +                      | -          | -                                  | -            | -                    | 3                | -                    |
| <i>L. farberi</i>                             | FSL-L7-0091 <sup>T</sup> | +                      | -          | -                                  | -            | -                    | 1                | -                    |
| <i>L. farberi</i>                             | FSL L7-1693              | +                      | -          | -                                  | -            | -                    | 1                | -                    |
| <i>L. farberi</i>                             | FSL L7-1699              | +                      | -          | -                                  | 1            | 1                    | 1                | -                    |
| <i>L. immobilis</i>                           | FSL-L7-1485              | +                      | -          | -                                  | 1            | -                    | 1                | 2                    |
| <i>L. immobilis</i>                           | FSL-L7-1509              | +                      | -          | -                                  | 1            | 1                    | 2                | 3                    |
| <i>L. immobilis</i>                           | FSL-L7-1510              | +                      | -          | -                                  | -            | 1                    | 2                | 2                    |
| <i>L. immobilis</i>                           | FSL-L7-1515              | +                      | -          | -                                  | 3            | -                    | 3                | 2                    |
| <i>L. immobilis</i>                           | FSL-L7-1517              | +                      | -          | -                                  | 1            | -                    | 2                | 2                    |
| <i>L. immobilis</i>                           | FSL-L7-1519 <sup>T</sup> | +                      | -          | -                                  | 3            | -                    | 3                | 2                    |
| <i>L. immobilis</i>                           | FSL-L7-1554              | +                      | -          | -                                  | 1            | -                    | 2                | 2                    |
| <i>L. immobilis</i>                           | FSL-L7-1558              | +                      | -          | -                                  | 1            | -                    | 2                | 3                    |
| <i>L. immobilis</i>                           | FSL-L7-1578              | +                      | -          | -                                  | 2            | -                    | 5                | 2                    |
| <i>L. portnoyi</i>                            | FSL L7-1582 <sup>T</sup> | -                      | -          | -                                  | 1            | -                    | 4                | -                    |
| <i>L. rustica</i>                             | FSL W9-0585 <sup>T</sup> | -                      | -          | -                                  | -            | -                    | -                | -                    |

<sup>†</sup> AMR gene hits from Resistance Gene Identifier (RGI; <https://card.mcmaster.ca/analyze/rgi>) analyses.

\* The number of intact prophages detected using PHASTER (<https://phaster.ca/>). Completeness scores (intact, questionable, incomplete) are based on the proportion of phage genes present in the draft genome.

<sup>‡</sup> The number of putative plasmid sequences detected using Platon (<https://github.com/oschwengers/platon>)

**Table S6: *In silico* DNA-DNA Hybridization (DDH) values between the *L. cossartiae* subspecies isolates**

|                                                                    | <i>L. cossartiae</i> subsp. <i>cayugensis</i> L7-0123 |                 |                                            | <i>L. cossartiae</i> subsp. <i>cayugensis</i> L7-0993 <sup>†</sup> |                 |                                            |
|--------------------------------------------------------------------|-------------------------------------------------------|-----------------|--------------------------------------------|--------------------------------------------------------------------|-----------------|--------------------------------------------|
|                                                                    | isDDH                                                 | CI <sup>†</sup> | Probability DDH >70% and >79% <sup>‡</sup> | isDDH                                                              | CI <sup>†</sup> | Probability DDH >70% and >79% <sup>‡</sup> |
| <i>L. cossartiae</i> subsp. <i>cossartiae</i> L7-0229              | 58.6%                                                 | 55.8-61.4%      | 47.58% and 11.30%                          | 60.9%                                                              | 58.8-63.7%      | 55.25% and 14.14%                          |
| <i>L. cossartiae</i> subsp. <i>cossartiae</i> L7-0233              | 58.9%                                                 | 56.1-61.7%      | 48.77% and 11.70%                          | 60.1%                                                              | 57.2-62.9%      | 52.63% and 13.76%                          |
| <i>L. cossartiae</i> subsp. <i>cossartiae</i> L7-0253              | 59.0%                                                 | 56.1-61.7%      | 48.82% and 11.72%                          | 60.6%                                                              | 57.7-63.4%      | 54.32% and 13.10%                          |
| <i>L. cossartiae</i> subsp. <i>cossartiae</i> L7-0478              | 58.6%                                                 | 55.8-61.3%      | 47.46% and 11.25%                          | 61.9%                                                              | 59.0-64.7%      | 58.38% and 15.48%                          |
| <i>L. cossartiae</i> subsp. <i>cossartiae</i> L7-1425              | 59.1%                                                 | 56.3-61.8%      | 49.23% and 11.86%                          | 61.6%                                                              | 58.7-64.4%      | 57.55% and 15.11%                          |
| <i>L. cossartiae</i> subsp. <i>cossartiae</i> L7-1426              | 58.8%                                                 | 56.0-61.5%      | 48.18% and 11.50%                          | 61.9%                                                              | 59.0-64.7%      | 58.42% and 15.50%                          |
| <i>L. cossartiae</i> subsp. <i>cossartiae</i> L7-1434              | 59.0%                                                 | 56.2-61.8%      | 49.05% and 11.80%                          | 61.5%                                                              | 58.7-64.3%      | 57.33% and 15.01%                          |
| <i>L. cossartiae</i> subsp. <i>cossartiae</i> L7-1435              | 59.0%                                                 | 52.6-61.8%      | 49.05% and 11.80%                          | 61.8%                                                              | 58.9-64.6%      | 58.04% and 15.33%                          |
| <i>L. cossartiae</i> subsp. <i>cossartiae</i> L7-1447 <sup>†</sup> | 59.1%                                                 | 56.3-61.9%      | 49.35% and 11.90%                          | 61.5%                                                              | 58.6-64.3%      | 57.09% and 14.91%                          |

<sup>†</sup> Confidence interval from the generalized linear model (GLM) used to infer isDDH (44).

<sup>‡</sup> The probability from a logistic regression model that DDH is >70% (i.e., same species) and >79% (i.e., same subspecies) (44).

Fig. S1

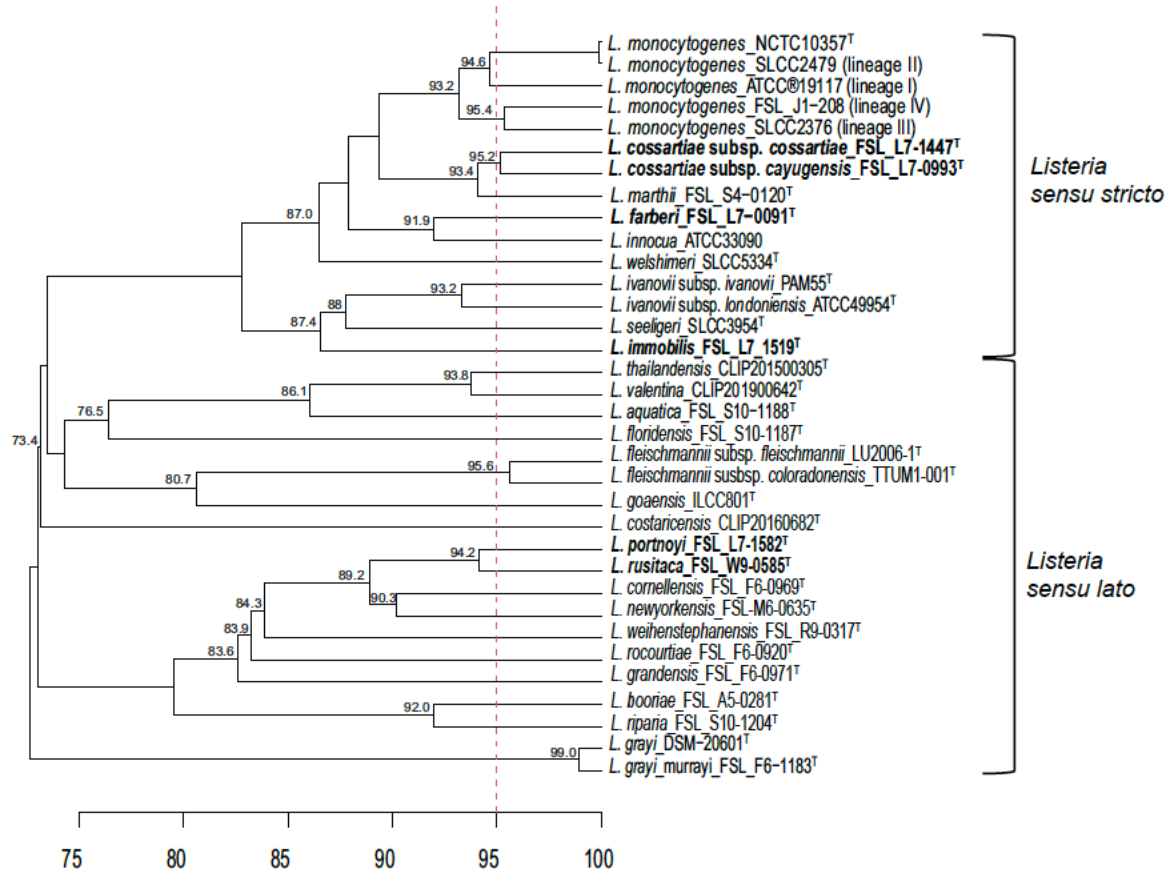

Supplement: ijsem-71-4795-s001.pdf [file ijsem-71-4795-s001.pdf]
